# Supplementary material for: Whole Health Action Management: A Randomized Controlled Trial of a Peer-Led Health Promotion Intervention
Source: Atypon-hosted journal article supplement (doi:10.1176/appi.ps.202000012), 2020-08-25
Supplement: appi.ps.202000012.ds001.pdf [file appi.ps.202000012.ds001.pdf]

**Online Supplement: Whole Health Action Management: A randomized controlled trial of a peer-led health promotion intervention**

**WHAM Randomized Controlled Trial Consort Chart**

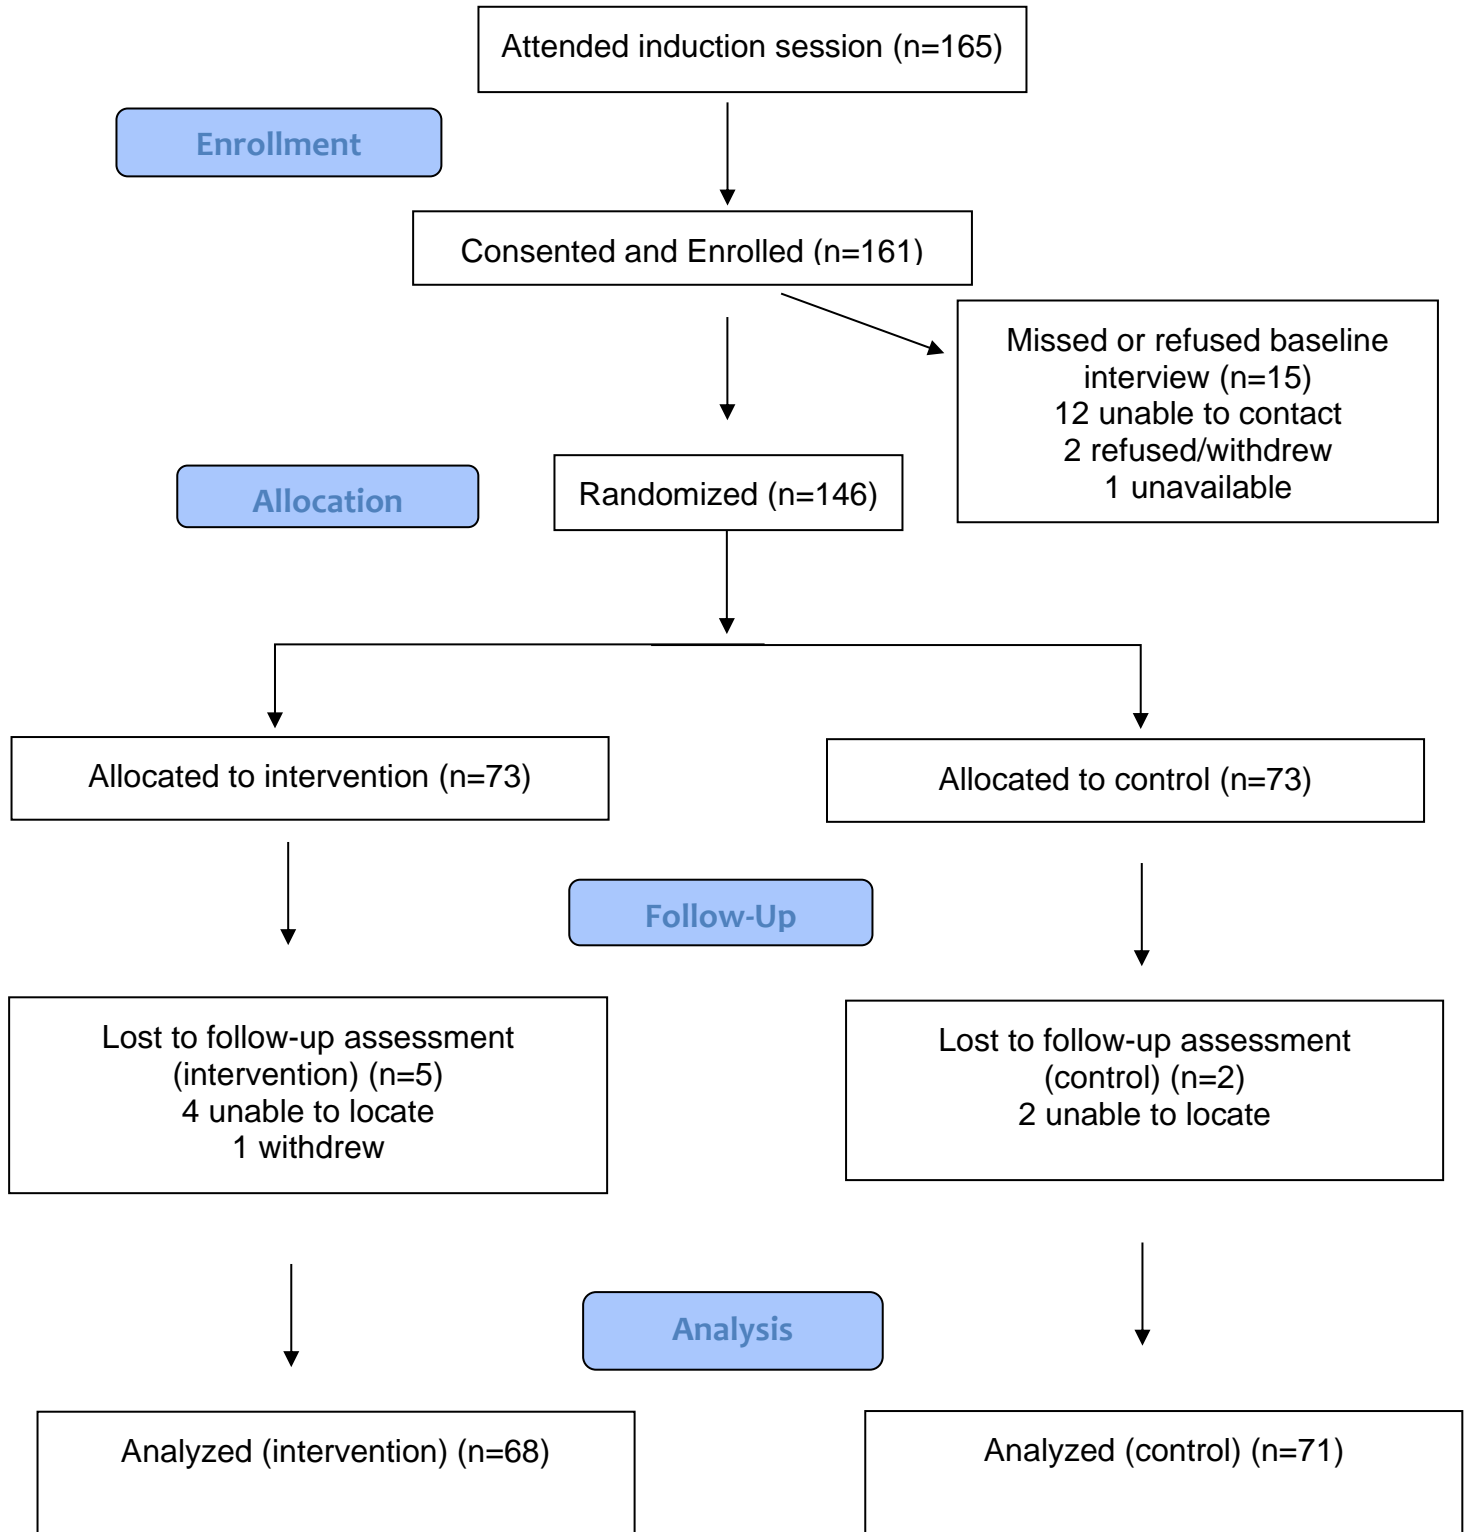

**Table of outcome measures by time point and study condition**

|                          | Baseline       |             |                   |             | Post-intervention |             |                   |             | 6-months       |             |                   |             |
|--------------------------|----------------|-------------|-------------------|-------------|-------------------|-------------|-------------------|-------------|----------------|-------------|-------------------|-------------|
|                          | WHAM<br>(n=68) |             | Control<br>(n=71) |             | WHAM<br>(n=68)    |             | Control<br>(n=69) |             | WHAM<br>(n=64) |             | Control<br>(n=66) |             |
|                          | n              | Mean<br>±SD | n                 | Mean<br>±SD | n                 | Mean<br>±SD | n                 | Mean<br>±SD | n              | Mean<br>±SD | n                 | Mean<br>±SD |
| Patient Activation Level | 68             | 2.7±1.1     | 71                | 2.9±0.9     | 68                | 2.9±1.0     | 69                | 2.6±0.9     | 64             | 2.8±1.1     | 66                | 2.6±1.0     |
| Self-Rated Health        | 68             | 3.5±1.1     | 71                | 3.7±1.0     | 68                | 3.8±1.1     | 69                | 3.5±1.1     | 64             | 3.8±1.0     | 66                | 3.7±1.0     |
| Total Hope               | 68             | 32.6±6.0    | 71                | 32.7±6.0    | 68                | 34.3±4.9    | 69                | 33.1±6.0    | 64             | 34.3±5.2    | 66                | 33.2±5.2    |
| Hope Pathways            | 68             | 11.8±2.1    | 71                | 11.8±2.2    | 68                | 12.4±2.0    | 69                | 11.9±2.5    | 64             | 12.4±2.0    | 66                | 11.7±2.1    |
| Hope Agency              | 68             | 11.8±2.6    | 71                | 11.6±2.5    | 68                | 12.2±2.0    | 69                | 11.7±2.5    | 64             | 12.2±2.2    | 66                | 12.0±2.4    |
|                          | n              | %           | n                 | %           | n                 | %           | n                 | %           | n              | %           | n                 | %           |
| Employed                 | 68             | 5.9%        | 71                | 9.9%        | 68                | 19.1%       | 69                | 7.2%        | 64             | 18.8%       | 66                | 6.1%        |
